# Supplementary material for: Skeletal Correlates for Body Mass Estimation in Modern and Fossil Flying Birds
Source: PubMed Central journal article supplement (PMC3843728; doi:10.1371/journal.pone.0082000), 2013-11-29

1

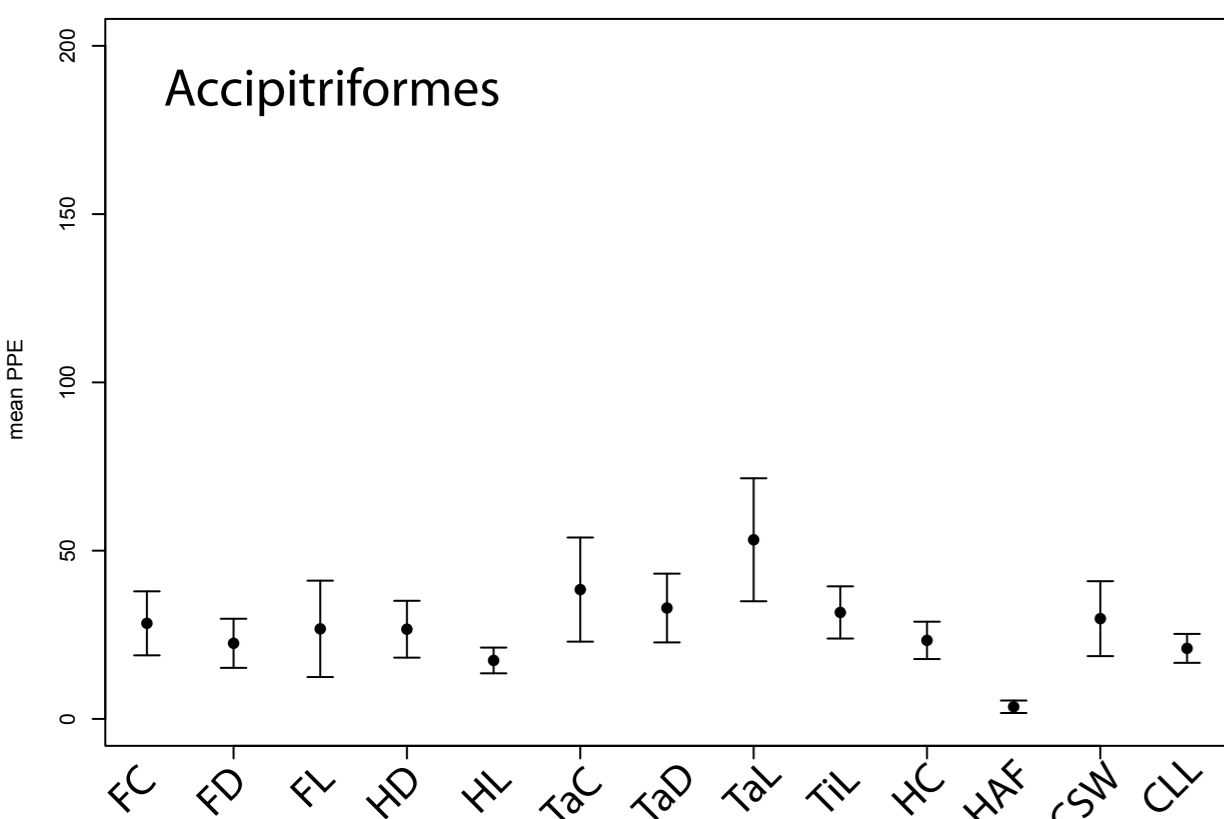

2

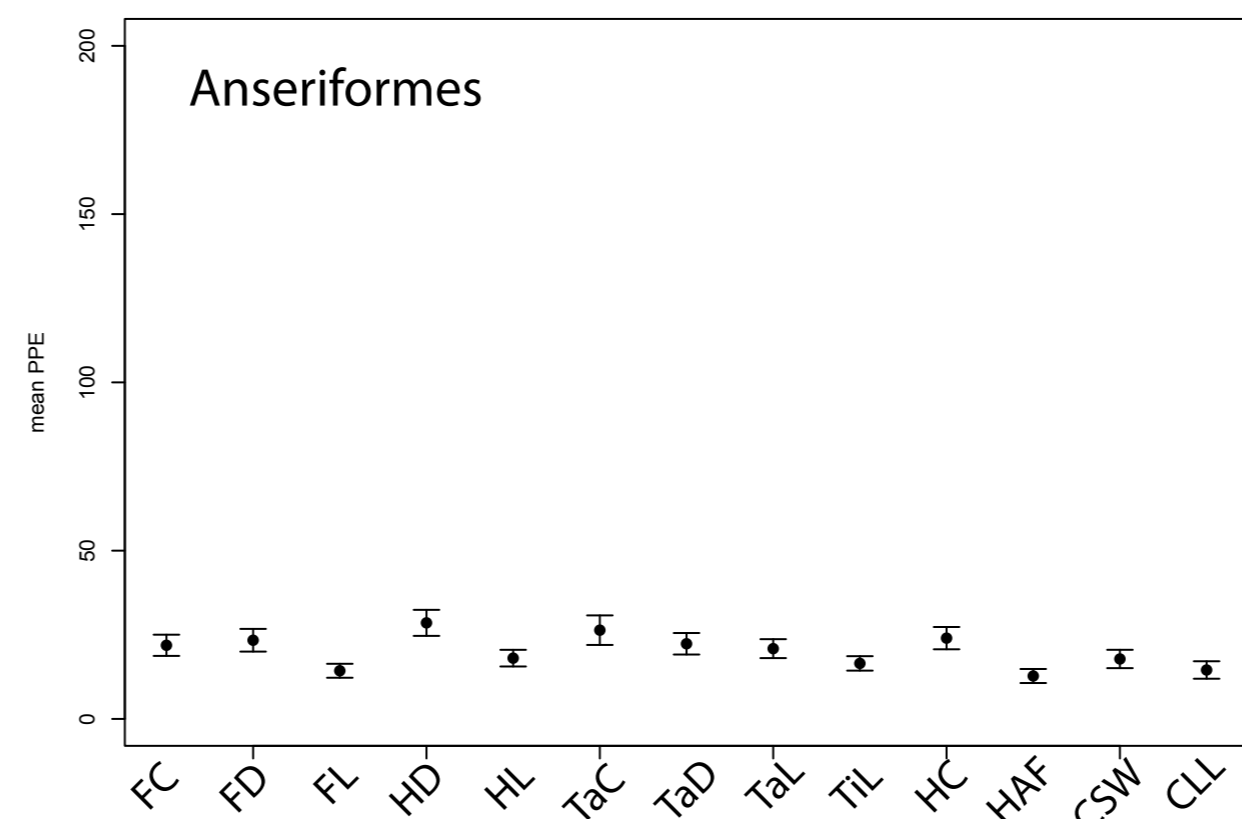

3

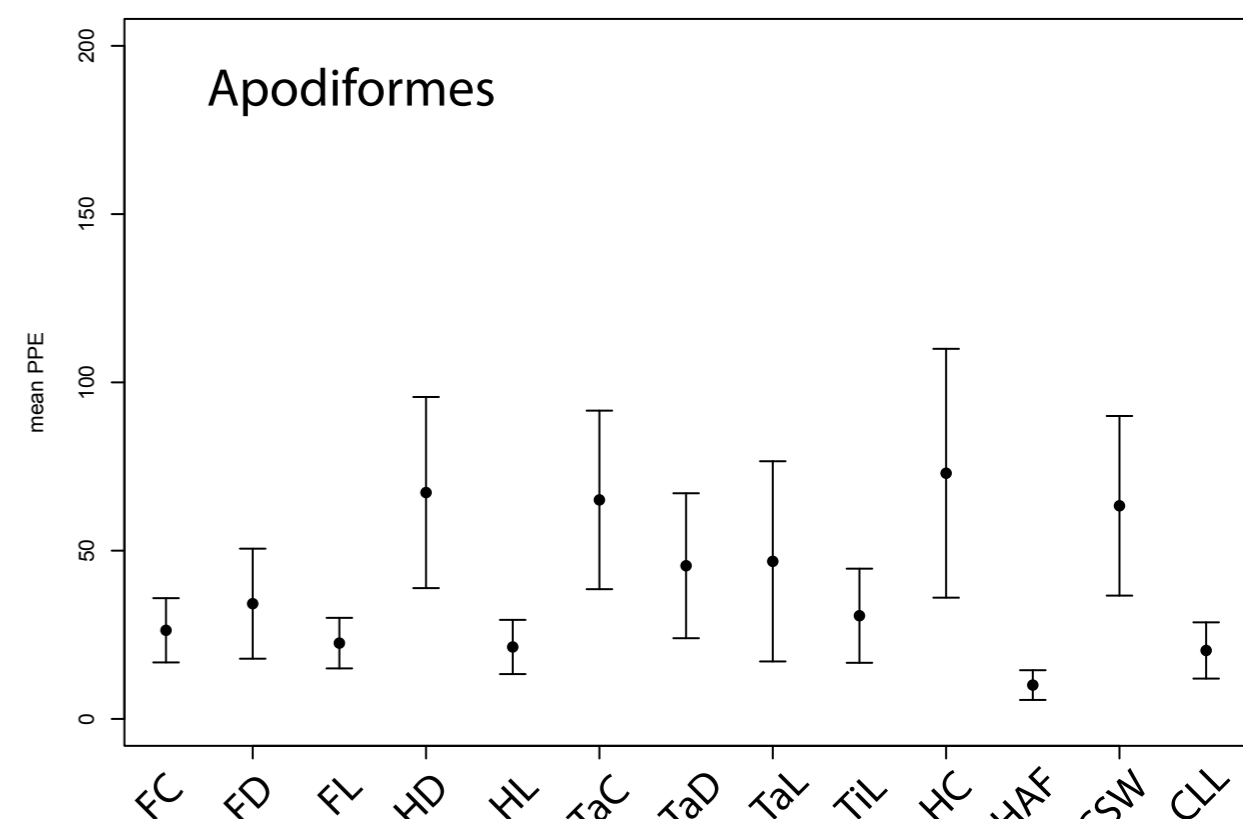

4

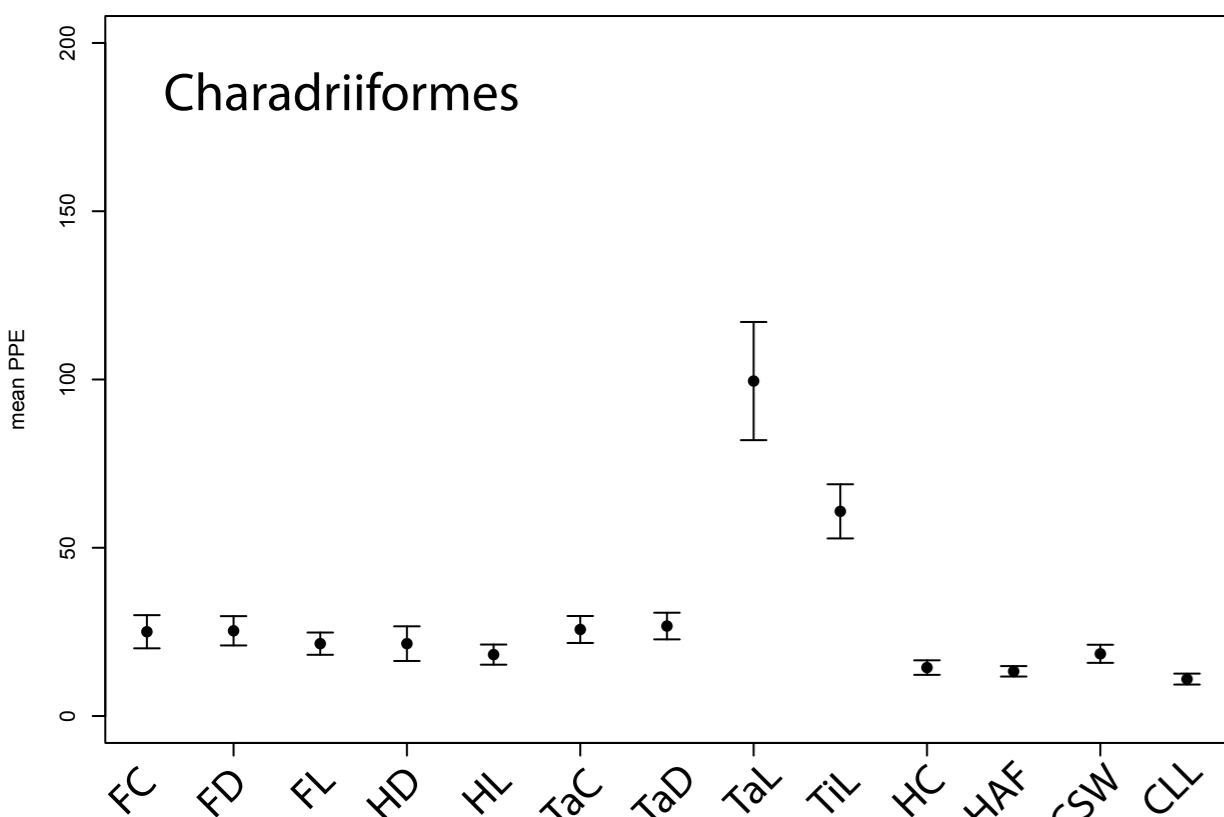

5

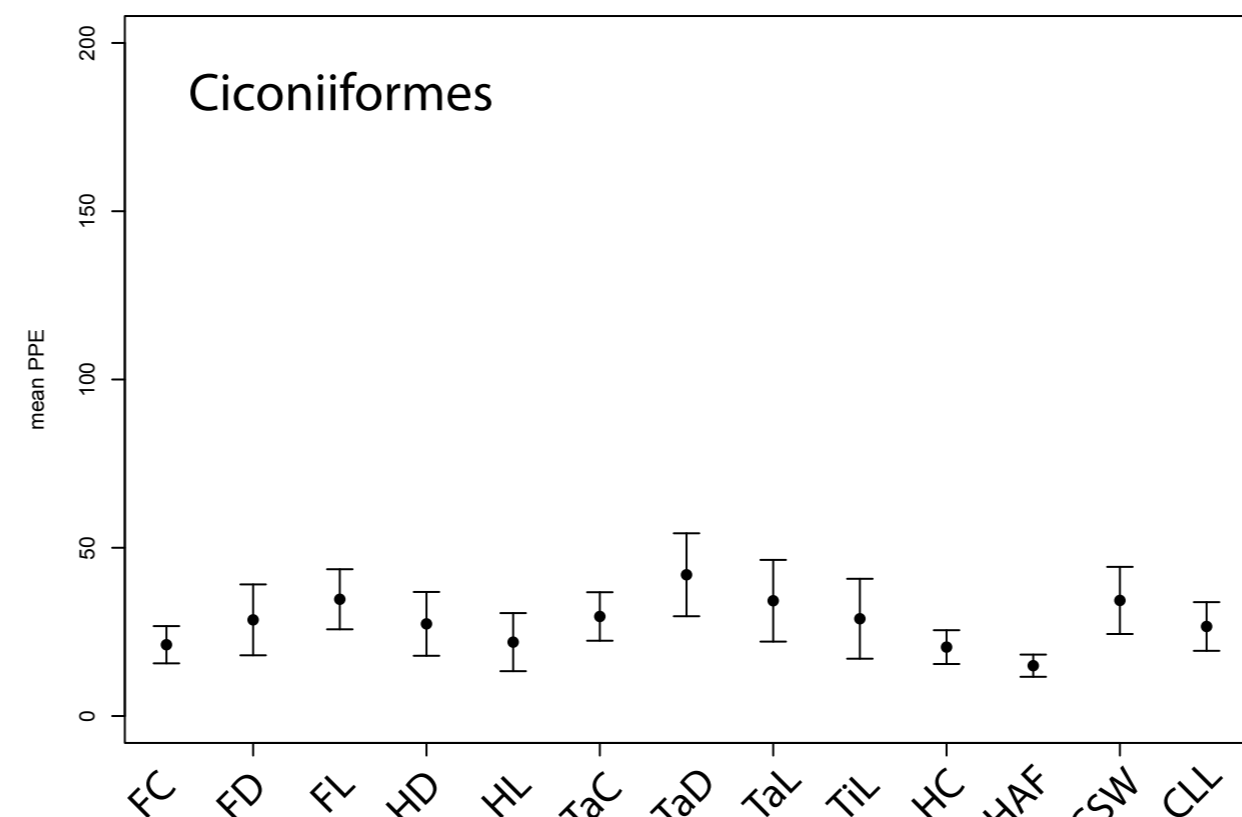

6

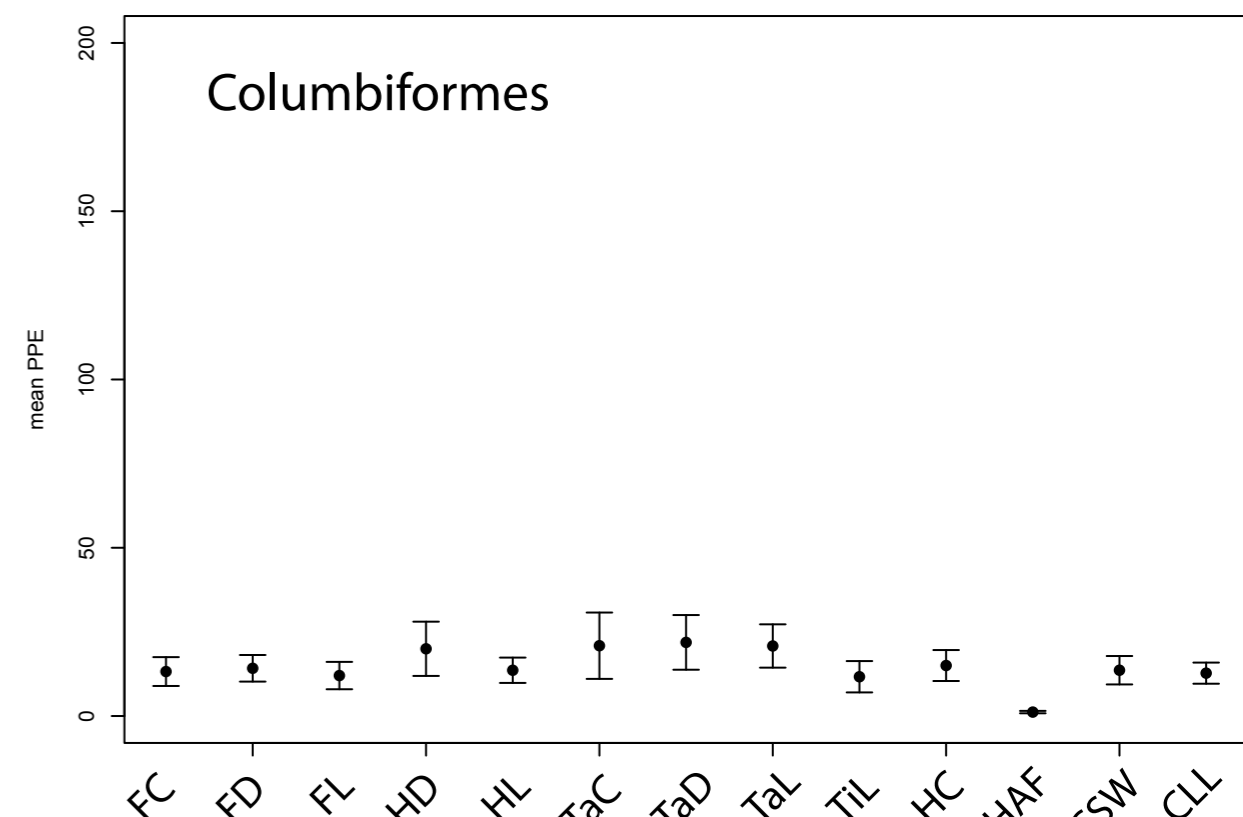

7

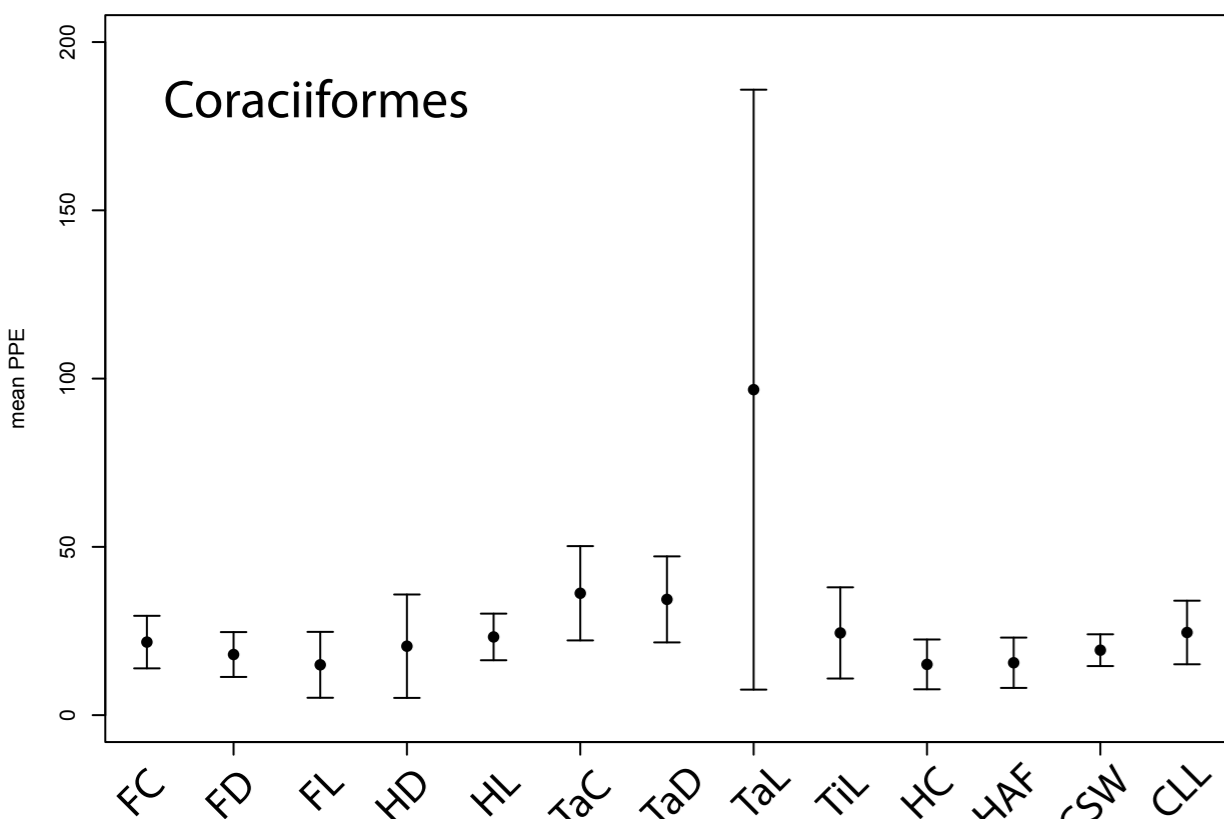

8

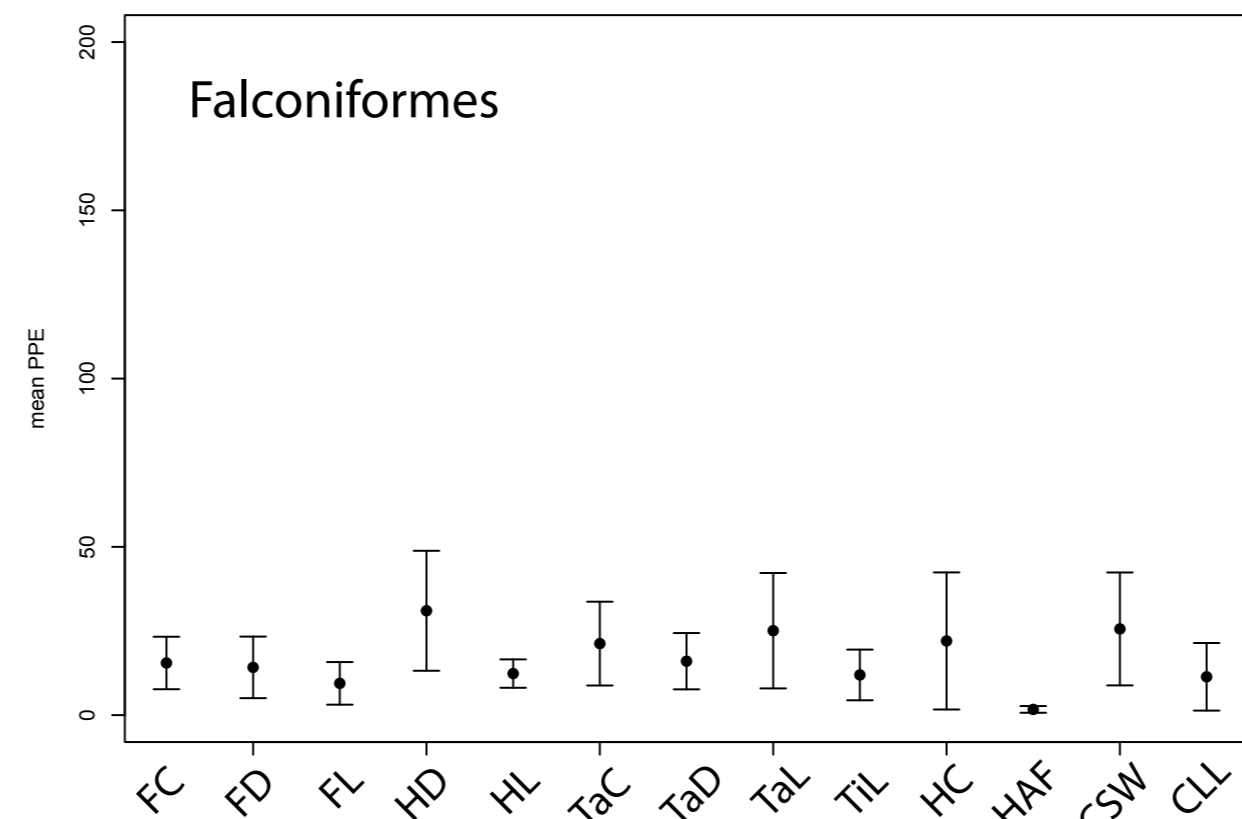

9

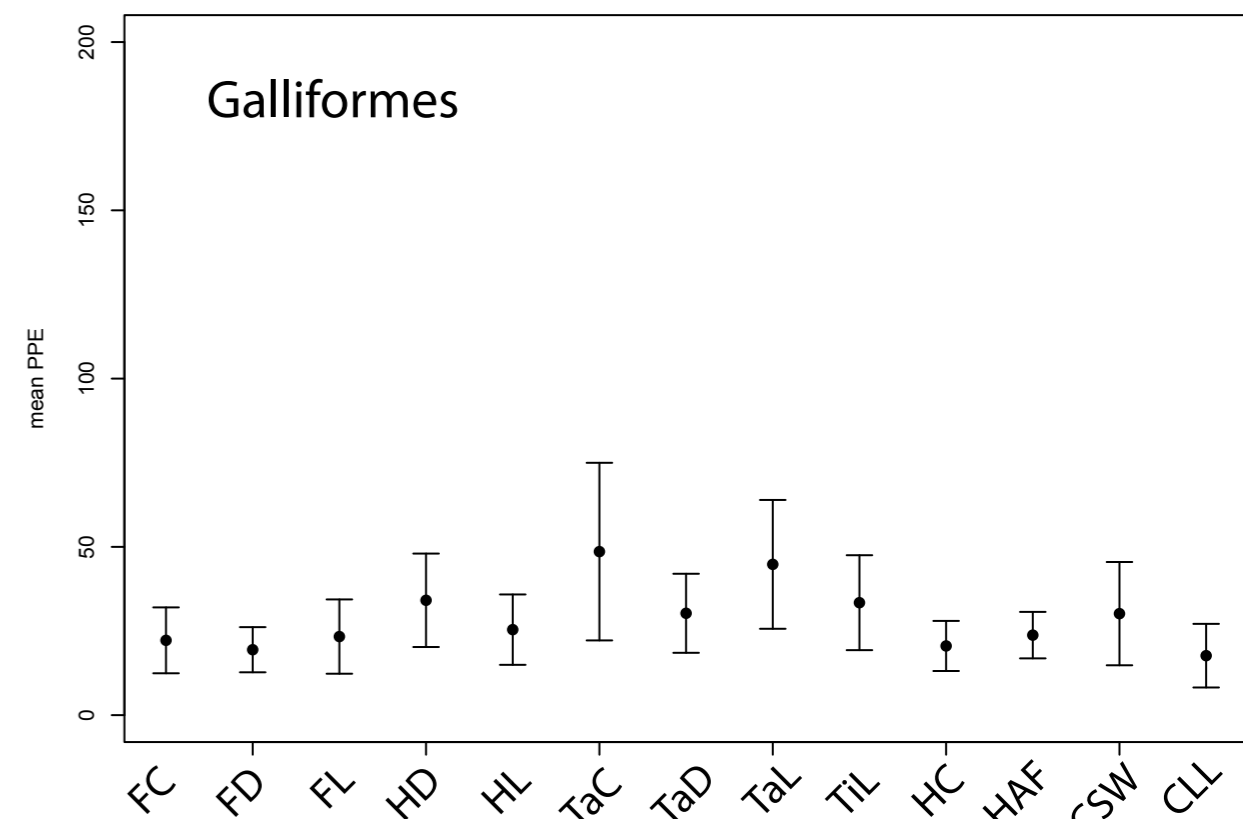

10

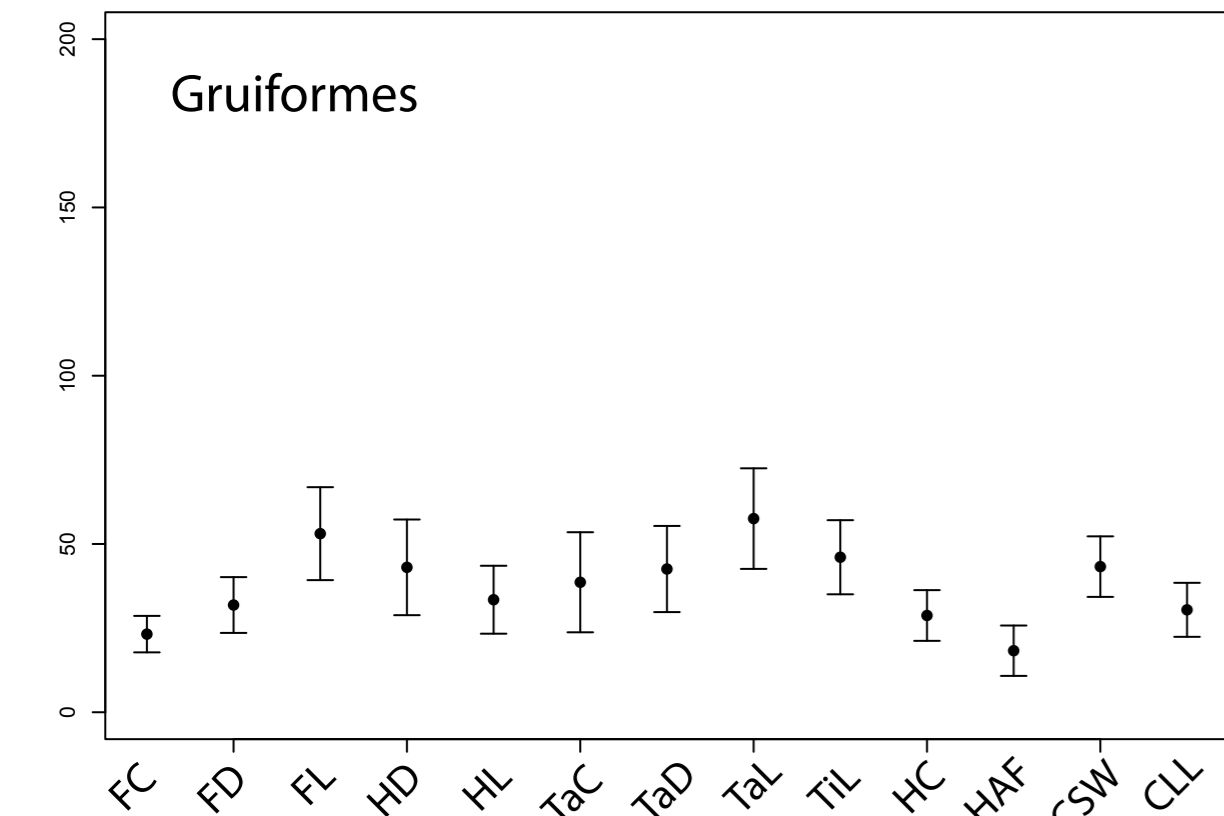

11

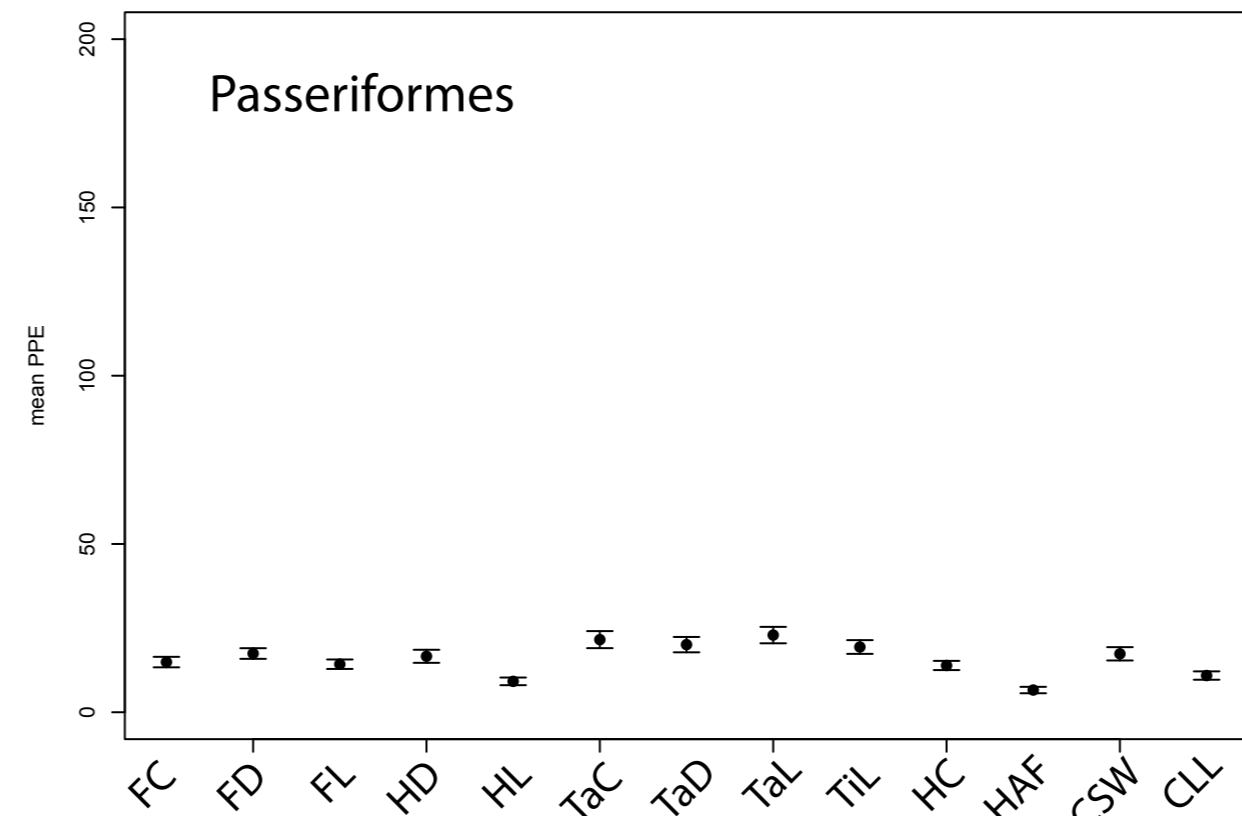

12

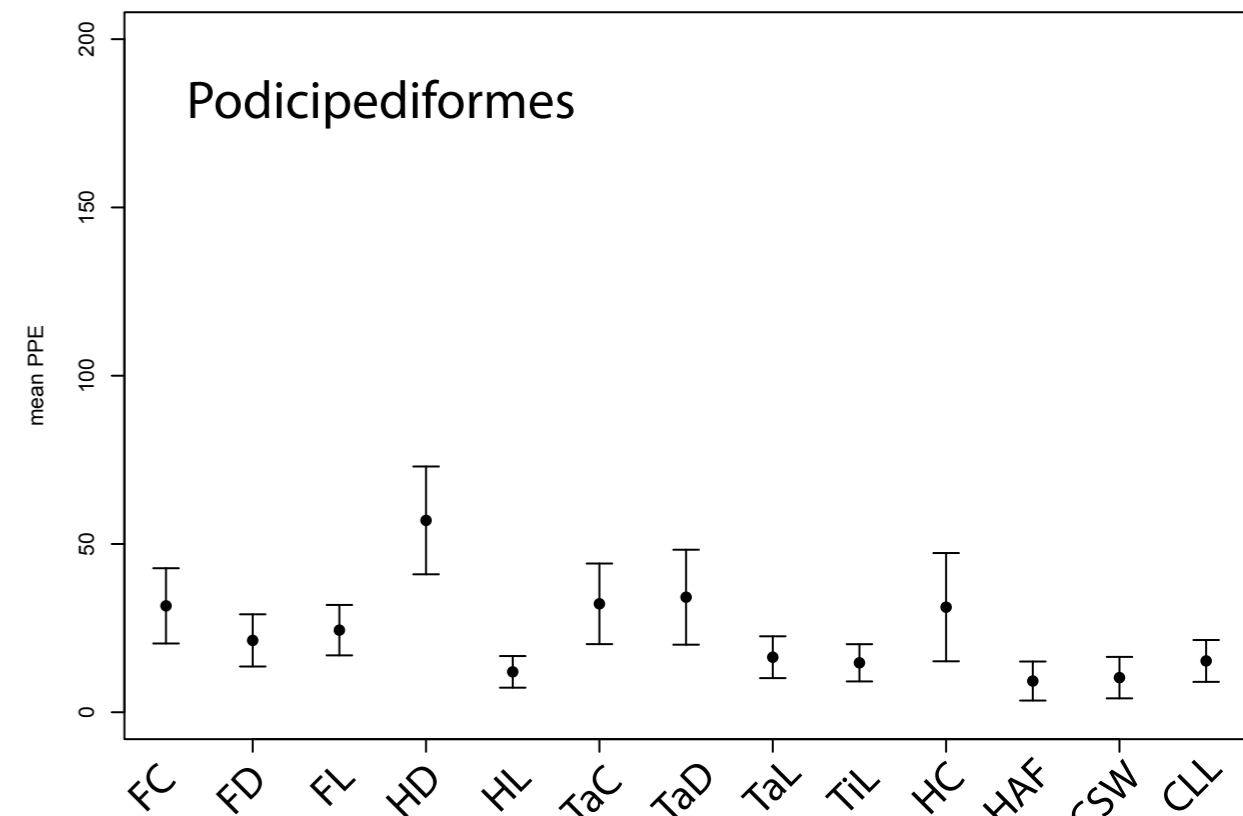

13

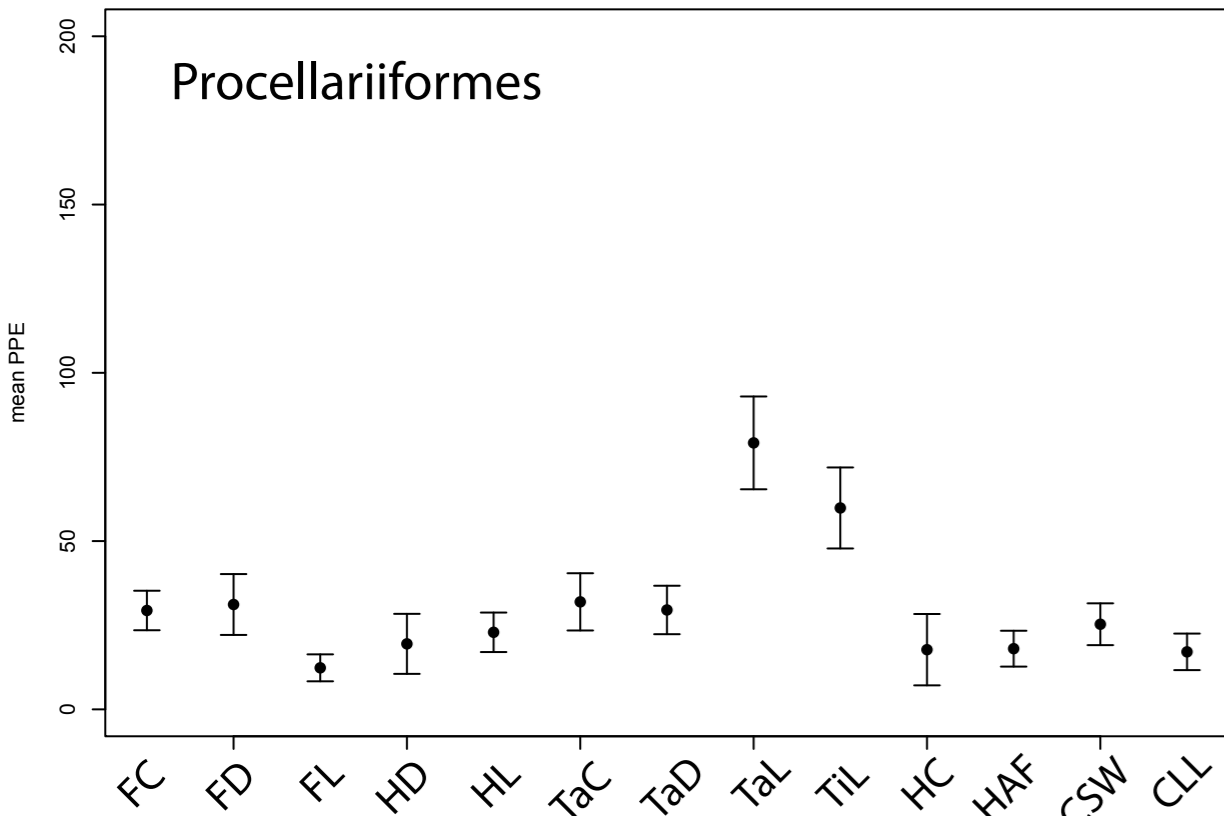

14

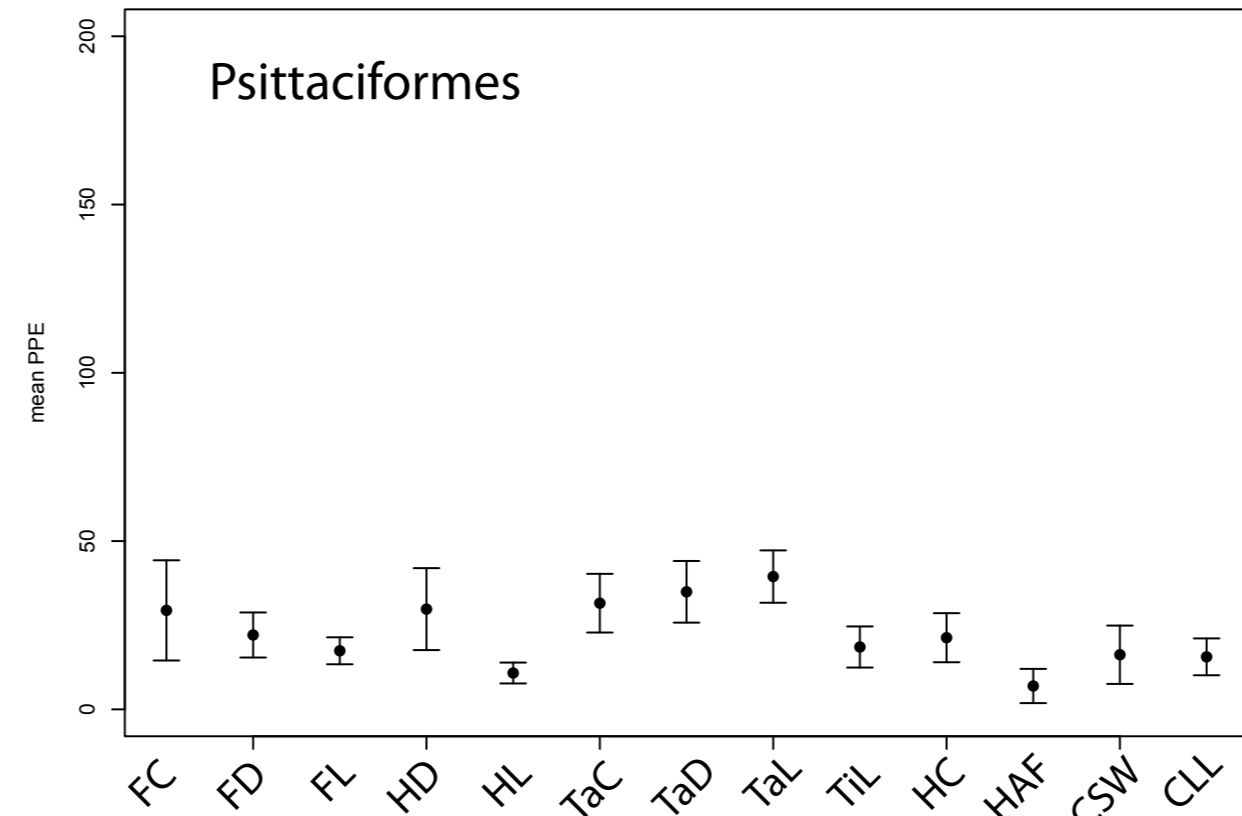

15

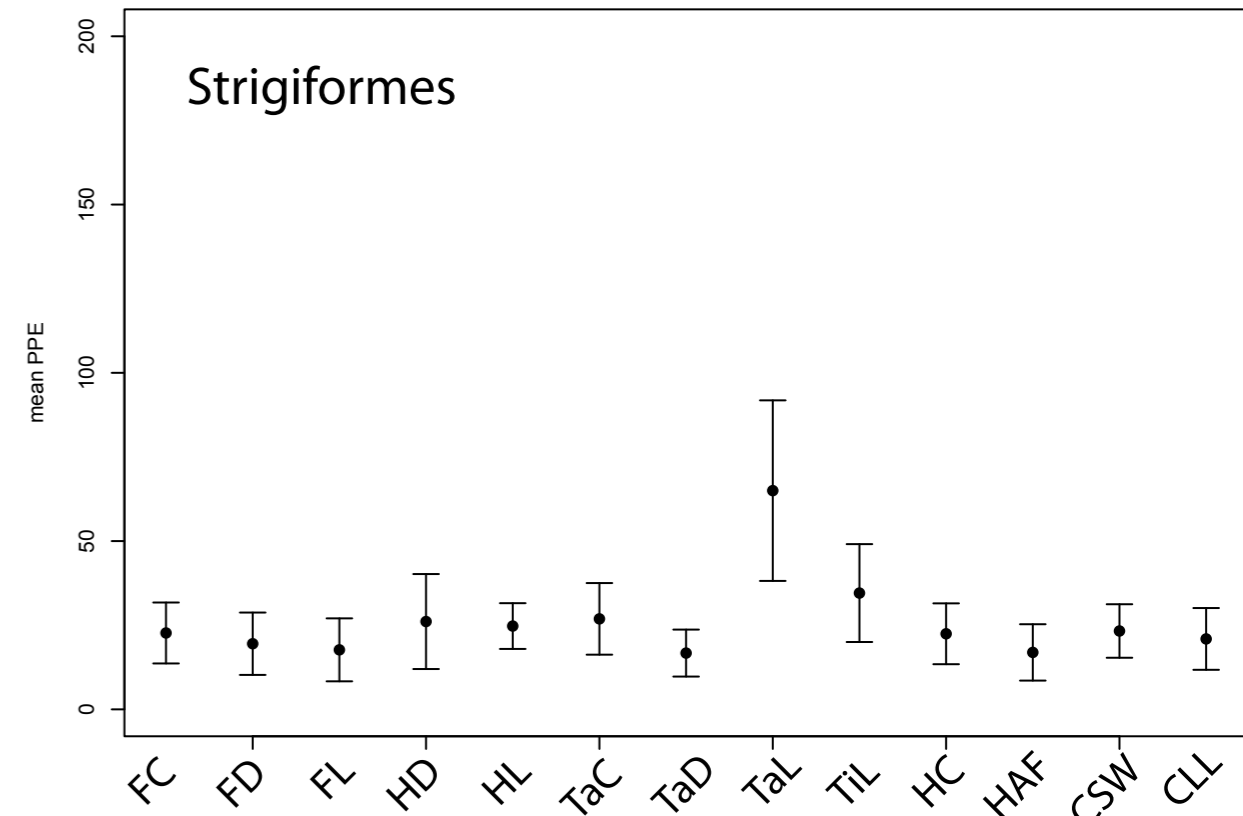

16

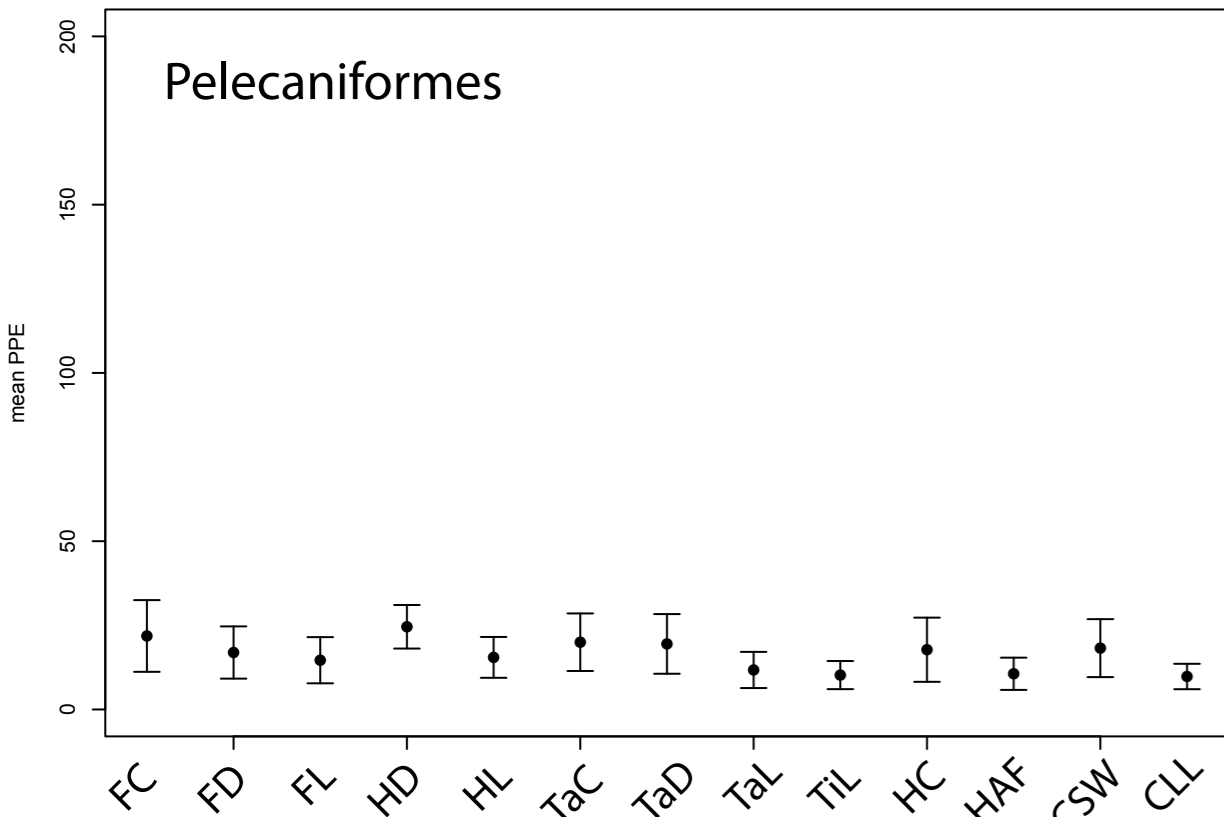

17

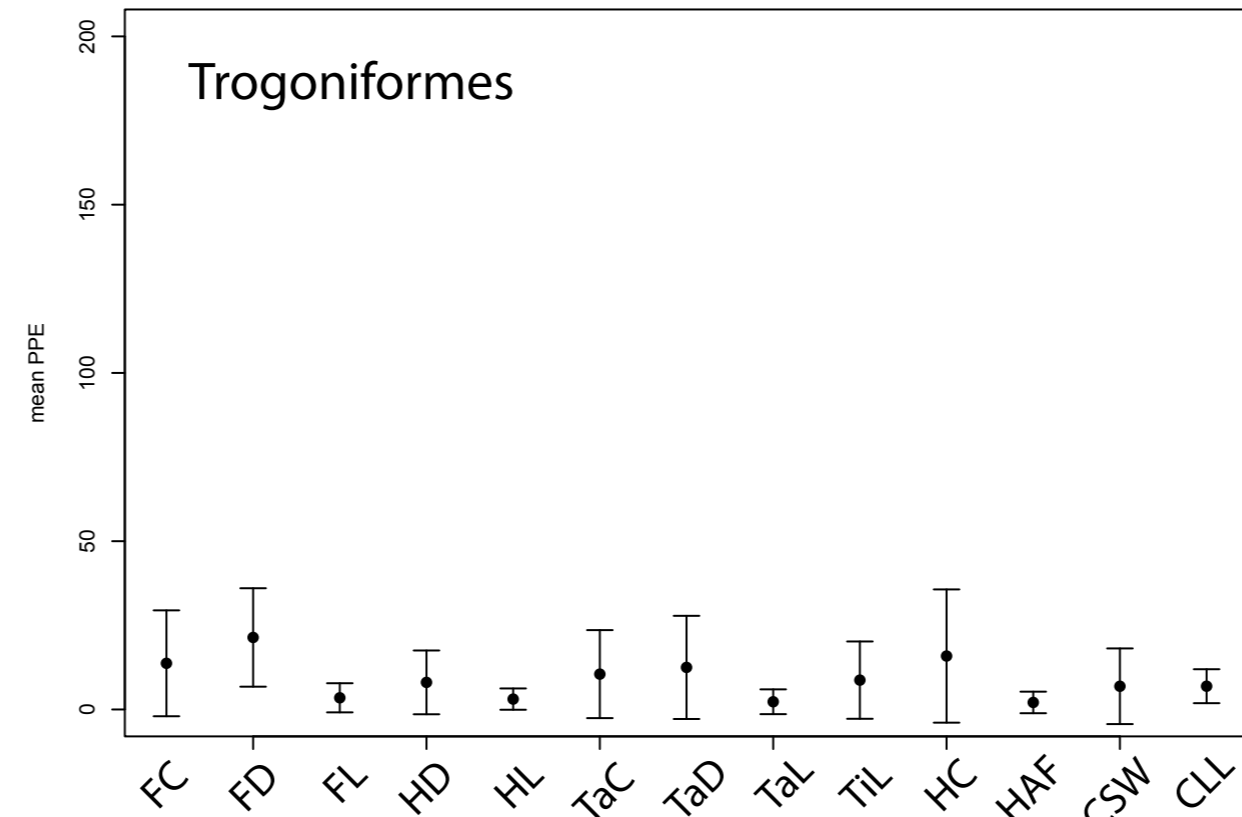

18

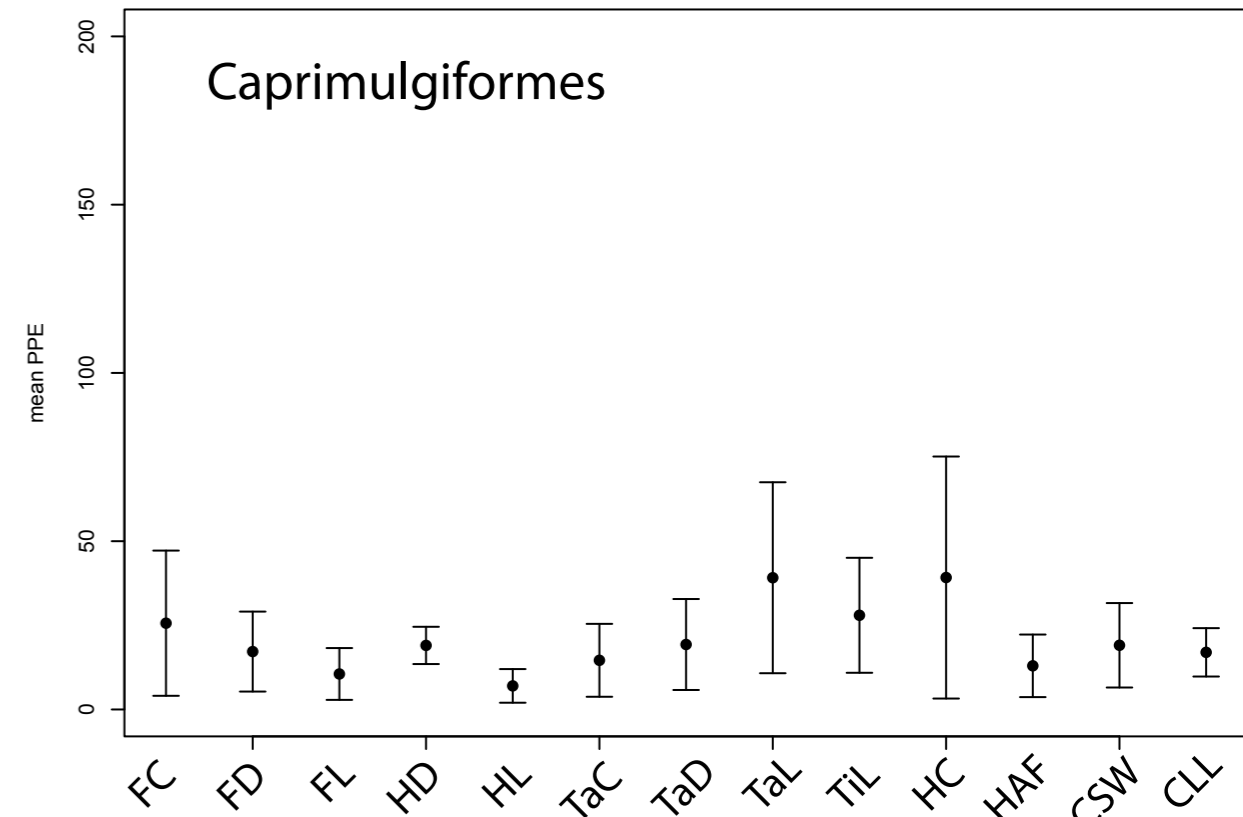

Supplement: pone.0082000.s001.pdf [file pone.0082000.s001.pdf]
